# Supplementary material
Source: PubMed Central journal article supplement (PMC8567309)
Supplement: NIHMS1721389-supplement-supinfo.pdf [file NIHMS1721389-supplement-supinfo.pdf]

1 **Table S1. Overlap of cognitive impairment and frailty at different levels of severity of**  
 2 **cognitive impairment**

| MoCA Cutpoint | No Impairment<br>N (%) | CI & Frailty<br>N (%) | CI Only<br>N (%) | Frailty Only<br>N (%) |
|---------------|------------------------|-----------------------|------------------|-----------------------|
| 23            | 652 (52)               | 108 (9)               | 420 (34)         | 64 (5)                |
| 22            | 742 (60)               | 93 (7)                | 330 (27)         | 79 (6)                |
| 21            | 821 (66)               | 73 (6)                | 251 (20)         | 99 (8)                |
| 20            | 884 (71)               | 56 (5)                | 188 (15)         | 116 (9)               |

3  
4  
5  
6  
7  
8

5 **Table S2. Odds of OAC treatment and receiving DOAC in relation to frailty and cognitive**  
 6 **impairment among older patients with paroxysmal atrial fibrillation, SAGE-AF 2016-2018**  
 7 **(N=741)**

|                                | Odds ratio (95% confidence interval) | Odds of <u>not</u> receiving OAC treatment (N=741)             |                   |                   |
|--------------------------------|--------------------------------------|----------------------------------------------------------------|-------------------|-------------------|
|                                |                                      | Unadjusted                                                     | Model 1           | Model 2           |
|                                | <b>On OAC<br/>n (%)</b>              |                                                                |                   |                   |
| <b>No impairment</b>           | 318 (82.0)                           | referent                                                       | referent          | referent          |
| <b>Frailty</b>                 | 31 (77.5)                            | 1.32 (0.60, 2.89)                                              | 1.94 (0.85, 4.41) | 2.00 (0.83, 4.83) |
| <b>CI</b>                      | 200 (78.4)                           | 1.25 (0.84, 1.85)                                              | 1.47 (0.98, 2.20) | 1.46 (0.93, 2.30) |
| <b>Both frailty and<br/>CI</b> | 51 (87.9)                            | 0.62 (0.27, 1.43)                                              | 0.94 (0.40, 2.24) | 0.99 (0.37, 2.66) |
|                                | <b>On DOAC<br/>n (%)</b>             | <b>Odds of receiving a DOAC among those on OAC<br/>(N=600)</b> |                   |                   |
| <b>No impairment</b>           | 165 (51.9)                           | referent                                                       | referent          | referent          |
| <b>Frailty</b>                 | 12 (38.7)                            | 0.59 (0.28, 1.25)                                              | 0.73 (0.33, 1.58) | 0.65 (0.27, 1.53) |
| <b>CI</b>                      | 93 (46.5)                            | 0.81 (0.57, 1.15)                                              | 0.88 (0.61, 1.27) | 0.87 (0.57, 1.33) |
| <b>Both frailty and<br/>CI</b> | 28 (54.9)                            | 1.13 (0.62, 2.04)                                              | 1.39 (0.75, 2.58) | 1.23 (0.60, 2.53) |

Note. OAC: Oral anticoagulation; DOAC: Direct-Acting Oral Anticoagulants

Model 1 is adjusted for CHA<sub>2</sub>DS<sub>2</sub>VASC score, Model 2 is adjusted for Model 1 + age, education, race, marital status, has-bled score, AMI, asthma/COPD, vision impairment, hearing impairment, social support, depression, anxiety, fall in the past 6 months.

9  
10  
11  
12  
13  
14  
15  
16
